# Supplementary material for: Tumor microenvironment characterization in stage IV gastric cancer
Source: Oxford University Press journal article supplement (doi:10.1042/bsr20201248), 2021-01-01
Supplement: bsr-2020-1248_supp.pdf [file bsr-2020-1248_supp.pdf]

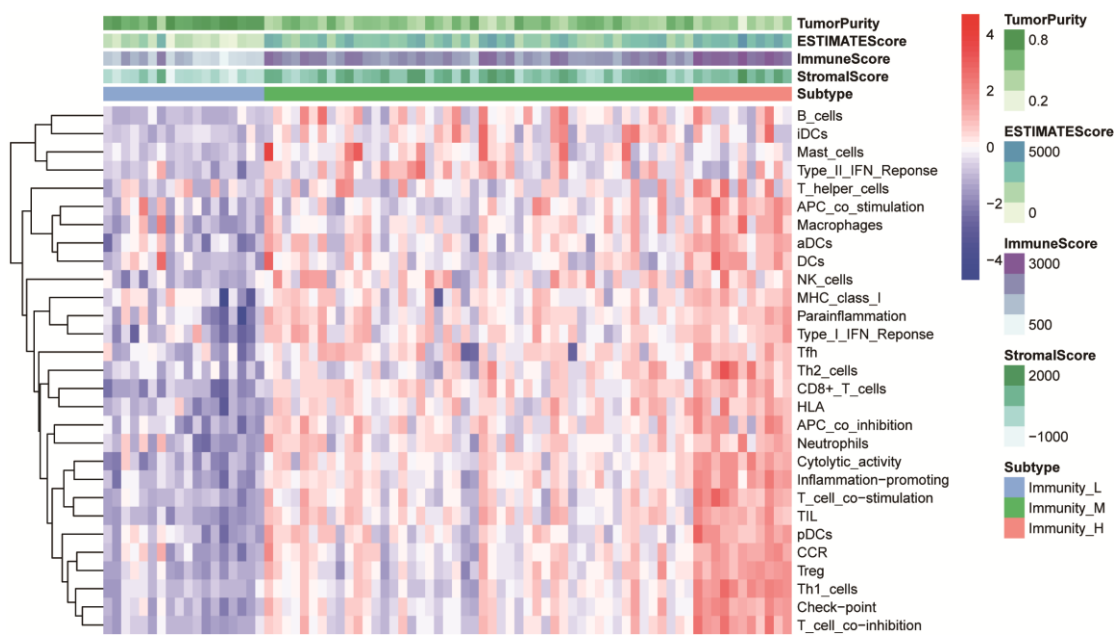

**Figure S1.** Hierarchical clustering of stage IV GC yields three subtypes in the Asian datasets of GSE62254

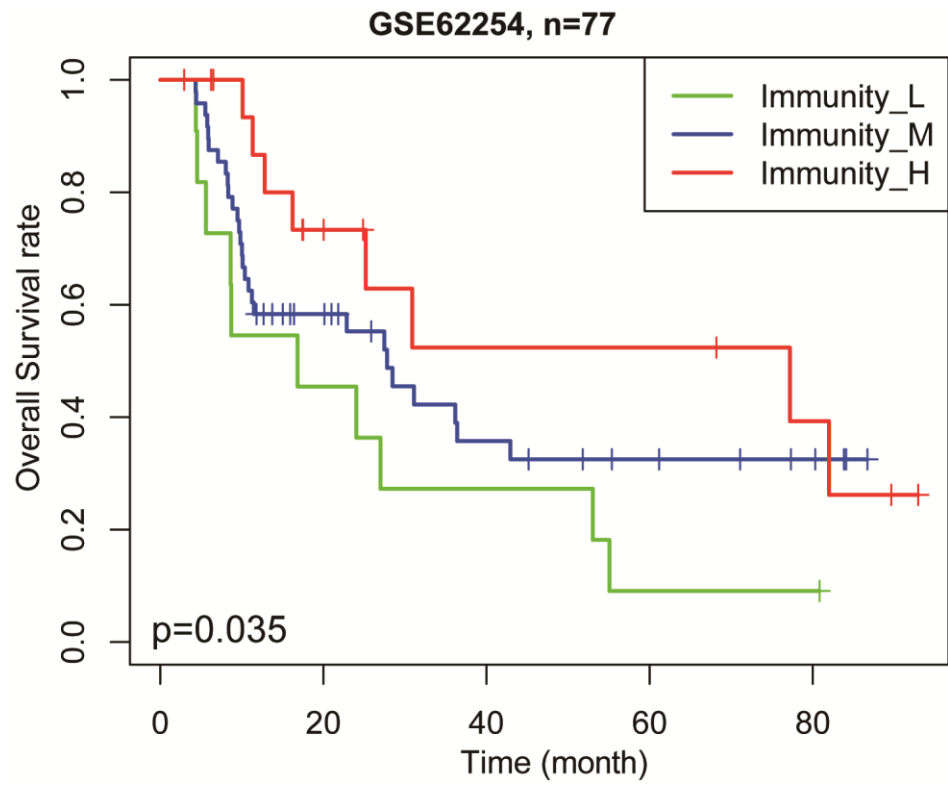

**TableS2.** 22 immune cell infiltration in three subtypes in stage IV GC in the GSE84437 and TCGA cohort.
